# Supplementary material for: Discordance of vancomycin minimum inhibitory concentration for methicillin-resistant Staphylococcus aureus at 2 μg/mL between Vitek II, E-test, and Broth Microdilution
Source: PeerJ. 2020 May 11;8:e8963. doi: 10.7717/peerj.8963 (PMC7224226; doi:10.7717/peerj.8963)
Supplement: Supplemental Information 1 — Each data point indicates the Vancomycin minimum inhibitory concentration for Methicillin-Resistant Staphylococcus aureus. (A) column 1: Infection source 1 = hospital-acquired infection; 0 = Community-acquired infection; (B) column 2: VitekII: MIC level; (C) column 3: E-test: MIC level; (D) column 4: Microdilution: MIC level. [file peerj-08-8963-s001.xlsx]

## Sheet: Sheet1
Infection source	VitekII	Etest	Mircodilution
1	0.5	0.5	1
0	1	0.5	1
0	1	0.5	1
0	2	1	2
1	1	0.5	1
1	2	1	2
0	2	0.5	1
1	2	0.5	1
1	2	0.5	1
1	2	0.5	1
1	2	0.5	1
0	0.5	1	1
1	0.5	1	1
0	2	2	2
0	2	2	2
0	2	2	2
0	1	1	1
0	1	1	1
0	1	1	1
0	1	1	1
0	1	1	1
0	1	1	1
0	1	1	1
0	1	1	1
0	1	1	1
0	1	1	1
0	1	1	1
0	1	1	1
0	1	1	1
0	1	1	1
0	1	1	1
0	1	1	1
0	1	1	1
0	1	1	1
0	1	1	1
0	1	1	1
0	1	1	1
0	1	1	1
0	1	1	1
0	1	1	1
0	1	1	1
0	1	1	1
0	1	1	1
0	1	1	1
0	1	1	1
0	1	1	1
0	1	1	1
0	1	1	1
0	1	1	1
0	1	1	1
0	1	1	1
0	1	1	1
0	1	1	1
0	1	1	1
0	1	1	1
0	1	1	1
0	1	1	1
0	1	1	1
0	0.5	0.5	0.5
0	0.5	0.5	0.5
0	0.5	0.5	0.5
0	0.5	0.5	0.5
0	0.5	0.5	0.5
0	0.5	0.5	0.5
0	0.5	0.5	0.5
0	0.5	0.5	0.5
0	0.5	0.5	0.5
0	0.5	0.5	0.5
0	0.5	0.5	0.5
0	0.5	0.5	0.5
0	0.5	0.5	0.5
0	0.5	0.5	0.5
0	0.5	0.5	0.5
0	0.5	0.5	0.5
0	0.5	0.5	0.5
0	0.5	0.5	0.5
0	0.5	0.5	0.5
0	0.5	0.5	0.5
0	0.5	0.5	0.5
0	0.5	0.5	0.5
0	0.5	0.5	0.5
0	0.5	0.5	0.5
0	0.5	0.5	0.5
0	0.5	0.5	0.5
0	0.5	0.5	0.5
0	0.5	0.5	0.5
0	0.5	0.5	0.5
0	0.5	0.5	0.5
0	0.5	0.5	0.5
0	0.5	0.5	0.5
0	0.5	0.5	0.5
0	0.5	0.5	0.5
0	0.5	0.5	0.5
0	0.5	0.5	0.5
0	0.5	0.5	0.5
0	0.5	0.5	0.5
0	0.5	0.5	0.5
0	0.5	0.5	0.5
0	0.5	0.5	0.5
0	0.5	0.5	0.5
0	0.5	0.5	0.5
0	0.5	0.5	0.5
0	0.5	0.5	0.5
0	0.5	0.5	0.5
0	0.5	0.5	0.5
0	0.5	0.5	0.5
0	0.5	0.5	0.5
0	0.5	0.5	0.5
0	0.5	0.5	0.5
0	0.5	0.5	0.5
0	0.5	0.5	0.5
0	0.5	0.5	0.5
0	0.5	0.5	0.5
0	0.5	0.5	0.5
0	0.5	0.5	0.5
0	0.5	0.5	0.5
0	0.5	0.5	0.5
0	0.5	0.5	0.5
0	0.5	0.5	0.5
0	0.5	0.5	0.5
0	0.5	0.5	0.5
0	0.5	0.5	0.5
0	0.5	0.5	0.5
0	0.5	0.5	0.5
0	0.5	0.5	0.5
0	0.5	0.5	0.5
0	0.5	0.5	0.5
0	0.5	0.5	0.5
0	0.5	0.5	0.5
1	2	2	2
1	2	2	2
1	2	2	2
1	2	2	2
1	2	2	2
1	2	2	2
1	2	2	2
1	2	2	2
1	2	2	2
1	2	2	2
1	1	1	1
1	1	1	1
1	1	1	1
1	1	1	1
1	1	1	1
1	1	1	1
1	1	1	1
1	1	1	1
1	1	1	1
1	1	1	1
1	1	1	1
1	1	1	1
1	1	1	1
1	1	1	1
1	1	1	1
1	1	1	1
1	1	1	1
1	1	1	1
1	1	1	1
1	1	1	1
1	1	1	1
1	1	1	1
1	1	1	1
1	1	1	1
1	1	1	1
1	1	1	1
1	1	1	1
1	1	1	1
1	1	1	1
1	1	1	1
1	1	1	1
1	1	1	1
1	1	1	1
1	1	1	1
1	1	1	1
1	1	1	1
1	1	1	1
1	1	1	1
1	1	1	1
1	1	1	1
1	1	1	1
1	1	1	1
1	0.5	0.5	0.5
1	0.5	0.5	0.5
1	0.5	0.5	0.5
1	0.5	0.5	0.5
1	0.5	0.5	0.5
1	0.5	0.5	0.5
1	0.5	0.5	0.5
1	0.5	0.5	0.5
1	0.5	0.5	0.5
1	0.5	0.5	0.5
1	0.5	0.5	0.5
1	0.5	0.5	0.5
1	0.5	0.5	0.5
1	0.5	0.5	0.5
1	0.5	0.5	0.5
1	0.5	0.5	0.5
1	0.5	0.5	0.5
1	0.5	0.5	0.5
0	1	0.5	0.5
0	2	1	1
0	2	1	1
1	1	0.5	0.5
1	2	1	1
1	2	1	1
1	2	1	1
1	2	1	1
1	0.5	1	0.5
0	2	2	1
0	1	1	0.5
0	1	1	0.5
0	1	1	0.5
1	2	2	1
1	1	1	0.5
1	1	1	0.5
1	1	1	0.5
